# Supplementary material for: Genome Sequence, Transcriptome, and Annotation of Rodent Malaria Parasite Plasmodium Yoelii Nigeriensis N67
Source: Research Square preprint supplement (doi:10.21203/rs.3.rs-162427/v1), 2021-02-04
Supplement: Supplementary file 1 [file 4e8b7c79f80f58c69fb1f735.xlsx]

## Sheet: Sheet1
Assembly Statistics	N67
Number of Contigs:	121
Number of chromosomes in the reference (17X):	16
Number of assembly bases:	21277183
Number of reference bases:	23083521
Number of LCBs:	11
Number of Blocks:	214
Breakpoint Distance:	204
DCJ Distance:	19
SCJ Distance:	408
Number of Gaps in Reference:	35690
Number of Gaps in Assembly:	31011
Number of missing chromosomes:	2
Number of extra contigs:	20
Number of Shared Boundaries:	0
Number of Inter-LCB Boundaries:	9
Contig N50:	300848
Contig N90:	5956
Min contig length:	5956
Max contig length:	979279
NG50	290,851
NA50	193,872
G + C content (%)	21.72
