# Supplementary material for: Genome Sequence, Transcriptome, and Annotation of Rodent Malaria Parasite Plasmodium Yoelii Nigeriensis N67
Source: Research Square preprint supplement (doi:10.21203/rs.3.rs-162427/v1), 2021-02-04
Supplement: Supplementary file 3 [file e0d9887bd9ee048f93a1bfd5.xlsx]

## Sheet: Sheet1
	Initial alignments
Name	Length (bp)	Mapped (bp)	Mean cov. (SD)
Py17X_01_v3	815147	10290387	12.6 (6.8)
Py17X_02_v3	982731	10831889	11.0 (7.0)
Py17X_03_v3	869676	10685579	12.3 (6.9)
Py17X_04_v3	1021539	13954592	13.7 (6.6)
Py17X_05_v3	1210876	16468806	13.6 (7.9)
Py17X_06_v3	1185181	16394574	13.8 (8.1)
Py17X_07_v3	1064364	14157540	13.3 (9.9)
Py17X_08_v3	1791361	23570622	13.2 (7.5)
Py17X_09_v3	2046250	27675754	13.5 (9.2)
Py17X_10_v3	2065729	28355490	13.7 (9.2)
Py17X_11_v3	2012183	26754907	13.3 (5.7)
Py17X_12_v3	2085115	27989086	13.4 (5.8)
Py17X_13_v3	3033250	41535459	13.7 (7.7)
Py17X_14_v3	2859712	38462510	13.5 (5.9)
Py17X_API_v3	34324	1508111	43.9 (6.1)
Py17X_MIT_v3	6083	2033752	3,34.3 (45.5)
Total	23043114	307127195	13.1
